# Supplementary material
Source: publisher figshare collection journal article supplement (https://sage.figshare.com/ndownloader/files/18542036)
Supplement: Supplementary file 1 [file 18542036]

**Appendix A1**

**Studies Included in the Meta-Analysis**

| **Study** | **Org. Action** | **Aspiration Type** | **Sample Size** | **Data Collection Method** | **Data Collection Period** | **Sample Location** | **Sample Characteristics** |
| --- | --- | --- | --- | --- | --- | --- | --- |
| Alessandri and Pattit, 2014 | R&D intensity | Social aspirations | 573 firms, 2,543 observations | Archival | 2001-2007 | U.S. | Manufacturing firms |
| Alessandri and Khan, 2006 | Investment and growth | Historical aspirations | 373 firms, 2,230 observations | Archival | 1998-2003 | U.S. | Publicly traded firms, multiple industries |
| Alexy et al., 2016 | R&D intensity | Combined aspirations, social dominating | 313 firms | Survey | 2008-2010 | UK | SMEs, technology and service firms |
| Arora and Dharwadkar, 2011 | Strategic change | Combined aspirations | 518 firms, 1,522 observations | Archival | 2000-2004 | U.S. | Multiple industries |
| Arrfelt et al., 2012 | Strategic change | Historical and social aspirations | 8,266 observations | Archival | 1998-2006 | U.S. | Multiple industries |
| Askin and Bothner, 2016 | Strategic change | Historical and social | 1,019 observations | Archival | 2005-2012 | U.S. | Liberal arts colleges |
| Audia and Brion, 2007 | Product innovations | Historical aspirations | 8 firms, 88 observations | Archival | 1988-1999 | U.S. | Publicly traded high-technology firms |
| Audia and Greve, 2006 | Investment and growth | Historical and social aspirations | 11 firms, 178 observations | Archival | 1974-1995 | Japan | Publicly traded manufacturing (ship building) firms |
| Audia et al., 2000 | R&D intensity | Social aspirations | 25 firms, 250 observations | Archival | 1974-1983 | U.S. | Airline and trucking firms |
| Barreto, 2012 | Strategic change | Combined aspirations, social dominating | 21 banks, 25,452 observations | Archival | 1991-1994 | Portugal | Commercial banks |
| Baum and Dahlin, 2007 | Strategic change | Historical and social aspirations | 189 observations | Archival | 1975-2001 | U.S. | Railroad firms |
| Baum et al., 2005 | Organizational risk taking | Historical and social aspirations | 375 firms, 2,465 observations | Archival | 1952-1990 | Canada | Investment banks |
| Ben-Oz and Greve, 2015 | Product innovations | Historical and social | 252 observations | Survey | 2007 | Israel | High-technology firms |
| Boyle and Shapira, 2012 | Organizational risk taking | Social aspirations | 112 observations | Archival | 1990-1999 | U.S. | *Jeopardy* game show decisions |
| Bromiley and Washburn, 2011 | R&D intensity | Historical and social aspirations | 1,366 firms, 22,189 observations | Archival | 1977-1997 | U.S. | Manufacturing firms |
| Calabrò et al., 2018 | Strategic change | Social aspirations | 432 observations | Archival | 2000-2014 | U.S. | Multiple industries |
| Castellanata et al., 2015 | Strategic change | Historical and social aspirations | 265 firms, 7,223 observations | Archival | 1973-2008 | 88 countries | Multiple industries |
| Ceci et al., 2016 | Strategic change | Historical and social aspirations | 762 observations | Survey | 2001-2006 | Italy | Manufacturing firms |
| Chen, 2008 | R&D intensity | Historical and social aspirations | 15,171 observations | Archival | 1980-2001 | U.S. | Manufacturing firms |
| Chen and Miller, 2007 | R&D intensity | Historical and social aspirations | 25,110 observations | Archival | 1980-2001 | U.S. | Manufacturing firms |
| Chrisman and Patel, 2012 | R&D intensity | Historical and social aspirations | 964 firms, 8,473 firm-year observations | Archival | 1998-2007 | U.S. | Manufacturing firms |
| Delmar and Wennberg, 2007 | Investment and growth | Combined aspirations, social dominating | 23,286 firms, 79,587 observations | Archival | 1995-2002 | Sweden | Knowledge-intensive industries |
| Desai, 2008 | Organizational risk taking | Social aspirations | 37 firms, 466 observations | Archival | 1978-2003 | U.S. | Railroad firms |
| Desai, 2013 | Strategic change | Historical and social aspirations | 1,105 firms, 6,632 observations | Archival | 1999-2004 | U.S. | Nursing homes |
| Desai, 2015a | Strategic change | Social aspirations | 86 firms, 607 observations | Archival | 2005-2011 | U.S. | For-profit hospitals |
| Desai, 2015b | Strategic change | Historical aspirations | 118 firms, 468 observations | Archival | 2003-2010 | U.S. | Hospitals |
| Eggers and Kaul, 2018 | Product innovations | Combined aspirations, social dominating | 16,455 firms, 785,490 observations | Archival | 1980-1997 | U.S. | Multiple industries |
| Ertug and Castellucci, 2015 | Strategic change | Historical aspirations | 2,043 observations | Archival | 1989-2005 | U.S. | NBA teams |
| Gaba and Bhattacharya, 2012 | Investment and growth | Historical and social aspirations | 204 firms, 1,424 observations | Archival | 1992-2003 | U.S. | Information technology firms |
| Gentry and Shen, 2013 | R&D intensity | Historical and social aspirations | 2,539 firms, 14,729 observations | Archival | 1979-2005 | U.S. | Manufacturing firms |
| Gomez-Mejia et al., 2015 | Investment and growth | Historical and social aspirations | 692 firms, 8,485 observations | Archival | 1997-2011 | U.S. | Manufacturing firms |
| Greve, 1998 | Strategic change | Historical and social aspirations | 160 firms, 16,294 observations | Archival | 1984-1992 | U.S. | Radio stations |
| Greve, 2003a | R&D intensity | Combined aspirations, historical dominating | 11 firms, 185 observations | Archival | 1971-1996 | Japan | Manufacturing (ship building) firms |
| Greve, 2003b | Investment and growth | Historical and social aspirations | 111 firms, 1,672 observations | Archival | 1964-1995 | Japan | Manufacturing (ship building) firms |
| Greve, 2007 | Product innovations | Combined aspirations, social dominating | 13 firms, 258 observations | Archival | 1971-2000 | Japan | Manufacturing (ship building) firms |
| Greve, 2008 | Organizational risk taking | Social aspirations | 161 firms, 4,842 observations | Archival | 1911-1996 | Norway | Insurance firms |
| Greve, 2010 | Investment and growth | Social aspirations | 288 firms, 2,151 observations | Archival | 1992-2004 | Multiple countries | Maritime shipping firms |
| Grohsjean et al., 2011 | Strategic change | Historical and social aspirations | 69 firms, 493 observations | Archival | 1990-2009 | U.S. | Video game publishing firms |
| Gubbi et al., 2015 | Strategic change | Historical and social aspirations | 298 firms, 2,729 observations | Archival | 1992-2005 | India | Pharmaceutical firms |
| Guo and Peng, 2017 | Product innovations | Combined aspirations, social dominating | 1,921 firms, 16,057 observations | Archival | 1988-2015 | China | Publicly traded firms, multiple industries |
| Harris and Bromiley, 2007 | Organizational risk taking | Historical and social aspirations | 868 observations | Archival | 1997-2002 | U.S. | Multiple industries |
| Hendron et al., 2013 | Strategic change | Historical and social aspirations | 164 firms, 494 observations | Archival | 1975-1986 | U.S. | Microcomputer firms |
| Hoang and Ener, 2015 | Product innovations | Historical and social aspirations | 52 firms, 369 observations | Archival | 1979-2000 | U.S. | Biotechnology firms |
| Hu et al., 2017 | Strategic change | Historical and social aspirations | 156 firms, 11,657 observations | Archival | 1972-2010 | Germany | Magazine publishing firms |
| Iyer and Miller, 2008 | Investment and growth | Historical and social aspirations | 6,302 firms, 51,567 observations | Archival | 1980-2000 | U.S. | Manufacturing firms |
| Jiang and Holburn, 2018 | Strategic change | Historical and social aspirations | 299 firms, 327,942 observations | Archival | 1976-2002 | Japan | Machinery firms |
| Jirasek, 2016 | R&D intensity | Historical and social aspirations | 20 firms, 199 observations | Archival | 2002-2014 | U.S. | Pharmaceutical firms |
| Jung and Bansal, 2009 | Strategic change | Historical and social aspirations | 701 firms, 4,206 observations | Archival | 1993-1998 | Japan | Publicly traded firms, multiple industries |
| Kacperczyk et al., 2015 | Organizational risk taking | Historical and social aspirations | 3,225 firms, 189,607 observations | Archival | 1980-2006 | U.S. | Mutual fund firms |
| Kavadis and Castaner, 2015 | Strategic change | Social aspirations | 60 firms, 414 observations | Archival | 2000-2007 | France | Publicly listed firms, multiple industries |
| Ketchen and Palmer, 1999 | Strategic change | Social aspirations | 66 observations | Survey | 1986-1990 | U.S. | Hospitals |
| Kim et al., 2015 | Investment and growth | Historical and social aspirations | 642 firms, 8,799 observations | Archival | 1988-2005 | U.S. | Commercial banks |
| Kim and Tsai, 2012 | Investment and growth | Social aspirations | 26 firms, 650 observations | Archival | 2004-2005 | U.S. | Car manufacturing firms |
| Kim and Rhee, 2014 | Strategic change | Combined aspirations, social dominating | 331 observations | Archival | 1986-2006 | U.S. | Feature film directors |
| Kim and Rhee, 2017 | Strategic change | Social aspirations | 358 firms, 4,163 observations | Archival | 1990-2014 | U.S. | Commercial airlines |
| Kotlar et al., 2013 | Strategic change | Historical and social aspirations | 1,540 firms, 4,903 observations | Archival | 2000-2006 | Spain | Manufacturing firms |
| Kotlar et al., 2014a | R&D intensity | Historical aspirations | 437 firms, 1,019 observations | Archival | 2000-2006 | Spain | Manufacturing firms |
| Kotlar et al., 2014b | R&D intensity | Social aspirations | 431 firms, 995 observations | Archival | 2000-2006 | Spain | Manufacturing firms |
| Kuusela et al., 2017 | Investment and growth | Historical and social aspirations | 530 firms, 4,660 observations | Archival | 1992-2014 | U.S. | Information and communications technology firms |
| Labianca et al., 2009 | Strategic change | Social aspirations | 131 firms | Survey | 2004 | U.S. | Business schools |
| Lant and Hewlin, 2002 | Strategic change | Historical and social aspirations | 116 observations | Simulation | Not specified | U.S. | MBA students |
| Lant and Hurley, 1999 | Strategic change | Historical aspirations | 417 observations | Simulation | Not specified | U.S. | MBA students |
| Lehman and Hahn, 2013 | Organizational risk taking | Social aspirations | 22,603 observations | Archival | 2000-2005 | U.S. | NFL teams |
| Lewellyn and Bao, 2015 | R&D intensity | Social aspirations | 83 firms, 664 observations | Archival | 2002-2010 | 13 countries | Paper products firms |
| Lim, 2015 | R&D intensity | Historical aspirations | 383 firms, 2,004 observations | Archival | 1994-2006 | U.S. | High-technology firms |
| Lim, 2017 | R&D intensity | Historical aspirations | 566 firms, 3,008 observations | Archival | 1994-2006 | U.S. | Manufacturing firms |
| Lim and McCann, 2014 | R&D intensity | Historical and social aspirations | 654 firms, 3,892 observations | Archival | 1992-2006 | U.S. | Manufacturing firms |
| Lin et al, 2012 | Investment and growth | Historical and social aspirations | 7290 observations | Archival | 1997-2006 | Taiwan | Manufacturing firms |
| Lin, 2014 | Strategic change | Historical and social aspirations | 656 firms, 5,904 observations | Archival | 2000-2008 | Taiwan | Multiple industries |
| Lin et al., 2011 | Investment and growth | Combined aspirations | 179 firms, 1,074 observations | Archival | 2000-2005 | Taiwan | Technology-intensive firms |
| Lohrke et al., 2006 | Investment and growth | Social aspirations | 657 observations | Survey | Not specified | 6 countries | SMEs, multiple industries |
| Lu and Fang, 2014 | R&D intensity | Combined aspirations | 274 firms, 4,163 observations | Archival | 1999-2008 | Taiwan | Electronics firms |
| Lucas et al., 2015 | R&D intensity | Historical and social aspirations | 1,750 observations | Archival | 2006-2009 | E.U. | Multiple industries |
| Lungeanu et al., 2015 | Strategic change | Historical and social aspirations | 30 firms, 392 observations | Archival | 1992-2006 | U.S. | Pharmaceutical firms |
| Ma, 2016 | Investment and growth | Historical aspirations | 31 units, 345 observations | Archival | 2000-2012 | China | Provincial units |
| Madsen, 2011 | Organizational risk taking | Historical and social aspirations | 133 firms, 915 observations | Archival | 1990-2007 | U.S. | Commercial aviation firms |
| Makarevich, 2018 | Strategic change | Historical and social aspirations | 9,837 observations | Archival | 1970-2003 | U.S. | Start-ups, multiple industries |
| Malen and Vaaler, 2017 | R&D intensity | Historical aspirations | 7,083 firms, 42,087 observations | Archival | 1991-2005 | 29 countries | Multiple industries |
| Massini et al, 2005 | Strategic change | Social aspirations | 409 observations | Survey | 1992-1996 | U.S. and U.K. | Multiple industries |
| Mezias et al., 2002 | Strategic change | Social aspirations | 86 firms, 860 observations | Archival | 1995-1997 | U.S. | Finance firms |
| Miller, 1994 | Strategic change | Social aspirations | 497 observations | Survey | 1990-1991 | Central America | Family firms, multiple industries |
| Mishina et al., 2010 | Organizational risk taking | Social aspirations | 194 firms, 1,749 observations | Archival | 1990-1999 | U.S. | Manufacturing firms |
| Moliterno et al., 2014 | Strategic change | Social and combined aspirations, social dominating | 18 firms, 6,534 observations | Archival | 1992-2003 | Germany | Bundesliga soccer teams |
| Moliterno and Wiersema, 2007 | Strategic change | Historical aspirations | 26 firms, 374 observations | Archival | 1969-1983 | U.S. | MLB teams |
| Murphy et al., 2001 | Strategic change | Historical aspirations | 810 observations | Field | 1995-1998 | U.S. | Retail firms |
| O'Brien and David, 2014 | R&D intensity | Combined aspirations, social dominating | 2,123 firms, 18,283 observations | Archival | 1992-2004 | Japan | Multiple industries |
| Park, 2007 | Strategic change | Combined aspirations, social dominating | 315 firms, 236,237 observations | Archival | 1985-2000 | U.S. | Food processing firms |
| Parker et al., 2015 | Product innovations | Combined aspirations, social dominating | 48 firms, 1,332 observations | Archival | 2006-2009 | U.S. | Video game publishing firms |
| Ref and Shapira, 2017 | Strategic change | Historical aspirations | 1,413 firms, 3,926 observations | Archival | 1999-2009 | U.S. | Manufacturing firms |
| Rhee et al., 2019 | R&D intensity | Combined Combined aspirations, historical dominating | 236 firms, 1,274 observations | Archival | 2001-2008 | Korea | R&D intensive firms (multiple industries) |
| Rostami, 2008 | Investment and growth | Historical and social aspirations | 79 firms, 948 observations | Archival | 1991-2002 | U.S. | Oil and gas firms |
| Rowley et al., 2017 | Strategic change | Combined aspirations, historical dominating | 2,736 observations | Archival | 2001-2010 | Canada | Publicly listed firms (multiple industries) |
| Rudy and Johnson, 2016 | Strategic change | Combined aspirations, social dominating | 100 firms, 2,190 observations | Archival | 1980-2006 | U.S. | Publicly listed firms (multiple industries) |
| Ruth et al., 2013 | Investment and growth | Historical aspirations | 29,497 observations | Archival | 1980-2000 | U.S. | Manufacturing industries |
| Salge, 2010 | R&D intensity | Social aspirations | 154 firms, 770 observations | Archival | 2002-2007 | U.K. | Hospitals |
| Salge et al., 2015 | R&D intensity | Social aspirations | 153 firms, 612 observations | Archival | 2002-2007 | U.K. | Hospitals |
| Schimmer and Brauer, 2012 | Strategic change | Historical and social aspirations | 1,191 firms, 10,719 observations | Archival | 1999-2008 | U.S. | Insurance firms |
| Schwab, 2007 | Strategic change | Historical aspirations | 16 firms, 70 observations | Archival | 1923-1940 | U.S. | Baseball teams |
| Sengul and Obloj, 2017 | Investment and growth | Historical and social aspirations | 456 firms, 1,206 observations | Archival | 1998-2004 | France | Multiunit firms (multiple industries) |
| Shimizu, 2007 | Strategic change | Social aspirations | 68 firms, 1,544 observations | Archival | 1988-1998 | U.S. | Publicly listed firms (multiple industries) |
| Shipilov et al., 2011 | Organizational risk taking | Historical and social aspirations | 21,706 observations | Archival | 1979-2001 | U.S. | Multiple industries |
| Souder and Bromiley, 2012 | Investment and growth | Combined aspirations, social dominating | 1,000 firms, 8,241 observations | Archival | 1991-2007 | U.S. | Multiple industries |
| Su and Si, 2015 | Product innovation | Historical and social aspirations | 145 firms, 22,092 observations | Archival | 1995-2010 | 40 countries | Multiple industries |
| Su and Su, 2017 | R&D intensity | Social aspirations | 6,539 observations | Archival | 2001-2003 | China | High-technology firms |
| Tarakci et al., 2018 | Strategic change | Historical and social aspirations | 123 observations | Survey | Not specified | U.S. | Multi-divisional firms |
| Tuggle et al., 2010 | Strategic change | Historical and social aspirations | 178 firms, 989 observations | Archival | 1994-2000 | U.S. | Publicly listed firms (multiple industries) |
| Tyler and Caner, 2015 | R&D intensity | Historical aspirations | 113 firms, 622 observations | Archival | 1997-2007 | U.S. | Biopharmaceutical firms |
| Vidal and Mitchell, 2015 | Strategic change | Historical aspirations | 117 firms, 1,127 observations | Archival | 1999-2009 | Multiple countries | Pharmaceutical firms |
| Villagrasa et al., 2018 | Strategic change | Social aspirations | 137 observations | Survey | 2006-2008 | Spain | Medium-sized firms, multiple industries |
| Wennberg and Holmquist, 2008 | Strategic change | Historical aspirations | 2355 observations | Survey | 1991-1995 | Sweden | SMEs, multiple industries |
| Xie et al., 2016 | Strategic change | Combined aspirations, historical dominating | 257 firms, 1,285 observations | Archival | 2007-2011 | China | Manufacturing firms |
| Yang et al., 2017 | Strategic change | Combined aspirations, historical dominating | 112 observations | Survey and archival | 2006-2007 | China | Manufacturing firms |
| Zhang, 2018 | Organizational risk taking | Social aspirations | 2275 observations | Archival | 2000-2015 | U.S. | Mutual fund firms |

Alessandri TM and Khan RH (2006) Market performance and deviance from industry norms: (Mis)alignment of organizational risk and industry risk. *Journal of Business Research* 59(10-11): 1105-1115.

Alexy O, Bascavusoglu-Moreau E and Salter A (2016) Toward an aspiration-level theory of open innovation. *Industrial and Corporate Change* 25(2): 289-306.

Arora P and Dharwadkar R (2011) Corporate governance and corporate social responsibility (CSR): The moderating roles of attainment discrepancy and organization slack. *Corporate Governance: An International Review* 19(2): 136-152.

Arrfelt M, Wiseman RM and Hult GTM (2012) Looking backward instead of forward: Aspiration-driven influences on the efficiency of the capital allocation process. *Academy of Management Journal* 56(4): 1081-1103.

Audia PG, Locke EA and Smith KG (2000) The paradox of success: An archival and a laboratory study of strategic persistence following radical environmental change. *Academy of Management Journal* 43(5): 837-853.

Barreto I (2012) A behavioral theory of market expansion based on the opportunity prospects rule. *Organization Science* 23(4): 1008-1023.

Ben-Oz C and Greve HR (2015) Short- and Long-Term Performance Feedback and Absorptive Capacity. *Journal of Management* 41(7): 1827-1853.

Boyle E and Shapira Z (2012) The liability of leading: Battling aspiration and survival goals in the Jeopardy! Tournament of Champions. *Organization Science* 23(4): 1100-1113.

Calabrò A, Minichilli A, Amore MD and Brogi M (2018) The courage to choose! Primogeniture and leadership succession in family firms. *Strategic Management Journal* 39(7): 2014-2035.

Castellaneta F, Gottschalg O, Kacperczyk A and Wright M (2015) The disadvantage of incomplete performance feedback: Evidence from private equity–backed buyouts. *Working Paper*.

Eggers JP and Kaul A (2018) Motivation and ability? A behavioral perspective on the pursuit of radical invention in multi-technology incumbents. *Academy of Management Journal* 61(1): 67-93.

Ertug G and Castellucci F (2015) Who shall get more? How intangible assets and aspiration levels affect the valuation of resource providers. *Strategic Organization* 13(1): 6-31.

Gaba V and Bhattacharya S (2012) Aspirations, innovation, and corporate venture capital: A behavioral perspective. *Strategic Entrepreneurship Journal* 6(2): 178-199.

Gentry RJ and Shen W (2013) The impacts of performance relative to analyst forecasts and analyst coverage on firm R&D intensity. *Strategic Management Journal* 34(1): 121-130.

Grohsjean T, Kretschmer T and Stieglitz N (2011) Performance feedback, firm resources, and strategic change. *DRUID Working Paper* 11-02.

Gubbi SR, Aulakh PS and Ray S (2015) International search behavior of business group affiliated firms: Scope of institutional changes and intragroup heterogeneity. *Organization Science* 26(5): 1485-1501.

Guo B and Ding P (2017) Invention or incremental improvement? Simulation modeling and empirical testing of firm patenting behavior under performance aspiration. *Decision Support Systems* 102: 32-41.

Hendron MG, Bednar MK and Henderson AD (2013) How performance relative to aspiration levels affects strategic responses to technological discontinuity. *Working Paper*.

Hoang H and Ener H (2015) Unpacking experience effects in developing novel products for new markets. *Strategic Organization* 13(4): 261-283.

Hu S, He Z-L, Blettner DP and Bettis RA (2017) Conflict inside and outside: Social comparisons and attention shifts in multidivisional firms. *Strategic Management Journal* 38(7): 1435-1454.

Jiang GF and Holburn GLF (2018) Organizational performance feedback effects and international expansion. *Journal of Business Research* 90: 48-58.

Jirásek M. (2016) Innovative behavior of US pharmaceutical firms. *Proceedings of the 4th International Conference on Innovation and Entrepreneurship.* Toronto, Ontario, Canada.

Kacperczyk A, Beckman CM and Moliterno TP (2015) Disentangling risk and change: Internal and external social comparison in the mutual fund industry. *Administrative Science Quarterly* 60(2): 228-262.

Ketchen Jr DJ and Palmer TB (1999) Strategic responses to poor organizational performance. *Journal of Management* 25(5): 683-706.

Kim K-H and Tsai W (2012) Social comparison among competing firms. *Strategic Management Journal* 33(2): 115-136.

Kim T and Rhee M (2014) Structural and behavioral antecedents of change: Status, distinctiveness, and relative performance. *Journal of Management*.

Kim E and Rhee M (2017) How airlines learn from airline accidents: An empirical study of how attributed errors and performance feedback affect learning from failure. *Journal of Air Transport Management* 58: 135-143.

Kotlar J, Fang H, De Massis A and Frattini F (2014b) Profitability goals, control goals, and the R&D investment decisions of family and nonfamily firms. *Journal of Product Innovation Management* 31(6): 1128-1145.

Lant TK and Hewlin PF (2002) Information cues and decision making: The effects of learning, momentum and socual comparison in competing teams. *Group & Organization Management* 27(3): 374-407.

Lant TK and Hurley AE (1999) A contingency model of response to performance feedback: Escalation of commitment and incremental adaptation in resource investment decisions. *Group & Organization Management* 24(4): 421-437.

Lim E (2017) CEO option wealth and firm risk-taking: An analysis of multiple reference points. *Long Range Planning* 50(6): 809-825.

Lim ENK (2015) The role of reference point in CEO restricted stock and its impact on R&D intensity in high-technology firms. *Strategic Management Journal* 36(6): 872-889.

Lim ENK and McCann BT (2014) Performance feedback and firm risk taking: The moderating effects of CEO and outside director stock options. *Organization Science* 25(1): 262-282.

Lin S-H, Chen Y-J, Hsu A-C, Liu Y-CA and Wang H-C (2012) Foreign direct investment behavir: Problemistic or slack search. *African Journal of Business Management* 6(28): 8250-8260.

Lohrke FT, Kreiser PM and Weaver KM (2006) The influence of current firm performance on future SME alliance formation intentions: A six-country study. *Journal of Business Research* 59(1): 19-27.

Lu L-H and Fang S-C (2014) Problematic search, slack search and institutional logic in corporate R&D strategy: An empirical analysis of Taiwanese electronics firms. *Journal of Management & Organization* 19(06): 659-678.

Lungeanu R, Stern I and Zajac EJ (2015) When do firms change technology-sourcing vehicles? The role of poor innovative performance and financial slack. *Strategic Management Journal*.

Ma L (2016) Performance feedback, government goal-setting and aspiration level adaptation: Evidence from Chinese provinces. *Public Administration* 94(2): 452-471.

Makarevich A (2018) Performance feedback as a cooperation “switch”: A behavioral perspective on the success of venture capital syndicates among competitors. *Strategic Management Journal* 39(12): 3247-3272.

Malen J and Vaaler PM (2017) Organizational slack, national institutions and innovation effort around the world. *Journal of World Business* 52(6): 782-797.

Mezias SJ, Chen Y-R and Murphy PR (2002) Aspiration-Level adaptation in an American financial services organization: A field study. *Management Science* 48(10): 1285-1300.

Miller KD (1994) What happens after success: the perils of excellence. *Journal of Management Studies* 31(3): 325-358.

Mishina Y, Dykes BJ, Block ES and Pollock TG (2010) Why “good” firms do bad things: The effects of high aspirations, high expectations, and prominence on the incidence of corporate illegality. *Academy of Management Journal* 53(4): 701-722.

Murphy PR, Mezias SJ and Chen Y-R (2001) Adapting aspirations to feedback: The role of success and failure. In: Lant TK and Shapira Z (eds) *Organizational Cognition: Computation and Interpretation.* Mahwah, NJ: Lawrence Erlbaum Associates.

Ref O and Shapira Z (2017) Entering new markets: The effect of performance feedback near aspiration and well below and above it. *Strategic Management Journal* 38(7): 1416-1434.

Rhee L, Ocasio W and Kim T (2019) Performance feedback in hierarchical business groups: The cross-level effects of cognitive accessibility on R&D search behavior. *Organization Science* 30(1): 51-69.

Rostami M. (2008) The joint effect of organizational performance and slack resources on corporate acquisitions in the oil industry. *Administrative Sciences Association of Canada.* Halifax, Nova Scotia, Canada.

Rowley TJ, Shipilov AV and Greve HR (2017) Board reform versus profits: The impact of ratings on the adoption of governance practices. *Strategic Management Journal* 38(4): 815-833.

Rudy BC and Johnson AF (2016) Performance, aspirations, and market versus nonmarket investment. *Journal of Management* 42(4): 936-959.

Ruth D, Iyer DN and Sharp BM (2013) Motivation and ability in the decision to acquire. *Journal of Business Research* 66(11): 2287-2293.

Salge TO (2010) A behavioral model of innovative search: Evidence from public hospital services. *Journal of Public Administration Research and Theory* 21(1): 181-210.

Schwab A (2007) Incremental organizational learning from multilevel information sources. *Organization Science* 18(2): 233-251.

Souder D and Bromiley P (2012) Explaining temporal orientation: Evidence from the durability of firms' capital investments. *Strategic Management Journal* 33(5): 550-569.

Su Y and Si S (2015) What motivates financial innovation across countries? The influences of performance aspiration and economic freedom. *Management International Review* 55(4): 563-587.

Su Y and Su T (2017) Performance aspiration, industrial search and R&D investment among chinese firms. *Chinese Management Studies* 11(2): 270-283.

Tarakci M, Ateş NY, Floyd SW, Ahn Y and Wooldridge B (2018) Performance feedback and middle managers’ divergent strategic behavior: The roles of social comparisons and organizational identification. *Strategic Management Journal* 39(4): 1139-1162.

Tuggle CS, Sirmon DG, Reutzel CR and Bierman L (2010) Commanding board of director attention: Investigating how organizational performance and CEO duality affect board members' attention to monitoring. *Strategic Management Journal* 31(9): 946-968.

Tyler BB and Caner T (2015) New product introductions below aspirations, slack and R&D alliances: A behavioral perspective. *Strategic Management Journal*.

Vidal E and Mitchell W (2015) Adding by subtracting: The relationship between performance feedback and resource reconfiguration through divestitures. *Organization Science* 26(4): 1101-1118.

Villagrasa J, Buyl T and Escribá-Esteve A (2018) CEO satisfaction and intended strategic changes: The moderating role of performance cues. *Long Range Planning* 51(6): 894-910.

Wennberg K and Holmquist C (2008) Problemistic search and international entrepreneurship. *European Management Journal* 26(6): 441-454.

Xie E, Huang Y, Peng MW and Zhuang G (2016) Resources, aspirations, and emerging multinationals. *Journal of Leadership & Organizational Studies* 23(2): 144-161.

Yang Z, Zhang H and Xie E (2017) Performance feedback and supplier selection: A perspective from the behavioral theory of the firm. *Industrial Marketing Management* 63: 105-115.

Zhang L (2018) Risk or uncertainty: The effect of performance on risk taking in the mutual fund industry. *Working Paper*.

**Appendix A2**

**Results of the Trim and Fill Analysis**

|  | **k** |  | **p** | **kTP** |  | **PTP** | **Z** | **PZ** |
| --- | --- | --- | --- | --- | --- | --- | --- | --- |
| **Overall Effect** |  |  |  |  |  |  |  |  |
| 1. Performance Feedback | 302 | -0.07 | 0.000 | 0 | -0.07 | 0.000 | 0 | 1.000 |
| **Social and Historical Aspirations** |  |  |
| 2. Social Aspirations | 128 | -0.08 | 0.000 | 0 | -0.08 | 0.000 | 0 | 1.000 |
| 3. Historical Aspirations | 119 | -0.07 | 0.000 | 0 | -0.07 | 0.000 | 0 | 1.000 |
| 4. Combined Aspirations | 39 | -0.01 | 0.062 | 0 | -0.01 | 0.000 | 0 | 1.000 |
| 5. Combined Aspirations, Social | 31 | -0.01 | 0.074 | 0 | -0.01 | 0.074 | 0 | 1.000 |
| 6. Combined Aspirations, Historical | 8 | -0.01 | 0.556 | 1 | -0.02 | 0.358 | 0.26 | 0.794 |
| **Performance Above and Below Aspirations** |  |  |
| 7. Performance Above Aspirations | 107 | -0.03 | 0.001 | 0 | -0.03 | 0.001 | 0 | 1.000 |
| 8. Performance Below Aspirations | 130 | -0.08 | 0.000 | 0 | -0.08 | 0.000 | 0 | 1.000 |
| **Different Forms of Organizational Actions** |  |  |
| 9. Investment and Growth | 59 | -0.06 | 0.001 | 0 | -0.06 | 0.001 | 0 | 1.000 |
| 10. Strategic Change | 135 | -0.07 | 0.000 | 0 | -0.07 | 0.000 | 0 | 1.000 |
| 11. R&D Intensity | 48 | -0.07 | 0.000 | 8 | -0.09 | 0.000 | 1.47 | 0.142 |
| 12. Organizational Risk Taking | 36 | -0.07 | 0.000 | 0 | -0.07 | 0.000 | 0 | 1.000 |
| 13. Product Innovation | 24 | -0.03 | 0.454 | 7 | 0.04 | 0.194 | -1.43 | 0.153 |

Notes: Number of data points (), sample size weighted mean effect size, number of missing studies from trim and fill analysis (kTP), predicted mean effect size with missing studies included (), Z-statistic (Z) for the critical ratio that indicates whether the two effect sizes are significantly different (significance of Z-test is determined using two-tailed tests).
